# Supplementary material
Source: HighWire-hosted journal article supplement (http://www.cmaj.ca/highwire/filestream/58801/field_highwire_adjunct_files/0/edit-tobacco-1-at.pdf)
Supplement: edit-tobacco-1-at.pdf [file edit-tobacco-1-at.pdf]

## Appendix 1: References

1. *Contraband tobacco enforcement strategy — August 2011*. Ottawa (ON): Royal Canadian Mounted Police; 2011. Available: [www.rcmp-grc.gc.ca/pubs/tobac-tabac/2011-contr-strat/2011-eng.pdf](http://www.rcmp-grc.gc.ca/pubs/tobac-tabac/2011-contr-strat/2011-eng.pdf) (accessed 2013 Mar. 7).
2. Mecredy GC, Diemert LM, Callaghan RC, et al. Association between use of contraband tobacco and smoking cessation outcomes: a population-based cohort study. *CMAJ* 2013; Mar. 18 [Epub ahead of print].
3. Sweeting J, Johnson T, Schwartz R. *Anti-contraband policy measures: evidence for better practice*. Toronto (ON): Ontario Tobacco Research Unit; 2009. Available: [http://otru.org/wp-content/uploads/2012/06/special\\_anti\\_contraband\\_measures.pdf](http://otru.org/wp-content/uploads/2012/06/special_anti_contraband_measures.pdf) (accessed 2013 Mar. 7).
4. *Contraband tobacco bill sets mandatory minimum sentences*. Toronto (ON): CBC News; Mar. 5, 2013. Available: [www.cbc.ca/news/politics/story/2013/03/05/pol-contraband-tobacco-mandatory-minimums.html](http://www.cbc.ca/news/politics/story/2013/03/05/pol-contraband-tobacco-mandatory-minimums.html) (accessed 2013 Mar. 7).
5. *Protocol to eliminate illicit trade in tobacco products*. New York (NY): United Nations; 2012. Available: <http://treaties.un.org/doc/Treaties/2012/12/20121206%2005-00%20PM/CTC%20IX-4-a.pdf> (accessed 2013 Mar. 7).
